# Supplementary material
Source: MDPI journal article supplement (https://www.mdpi.com/1996-1073/14/6/1580)
Supplement: s1 [file s1]

## Supplementary material

**Table S1.** Tableau of the six selected scenarios and their combinations of descriptor variants (the definitions of all descriptors and their variants can be found in detail in <https://elib.uni-stuttgart.de/handle/11682/5710?locale=en>)

| Target - centralized                                                                                                                        | Target                                                                                                                | Market                                                                                                                                              | Value Change                                                                                                                                        | Coping with pressure                                                                                                                        | Inertia                                                                                                                                     |
|---------------------------------------------------------------------------------------------------------------------------------------------|-----------------------------------------------------------------------------------------------------------------------|-----------------------------------------------------------------------------------------------------------------------------------------------------|-----------------------------------------------------------------------------------------------------------------------------------------------------|---------------------------------------------------------------------------------------------------------------------------------------------|---------------------------------------------------------------------------------------------------------------------------------------------|
|                                                                                                                                             | global development in general:<br>market forces<br>global fossil price pathway:<br>medium (166 \$/b in 2050)          |                                                                                                                                                     | global development in general:<br>policy reform<br>global fossil price pathway:<br>low (100 \$/b in 2050)                                           | global development in general:<br>market forces<br>global fossil price pathway:<br>high (210 \$/b in 2050)                                  | global development in general:<br>fortress world                                                                                            |
|                                                                                                                                             | global interest rate trend:<br>moderate recovery of interest rates (2.5%)                                             |                                                                                                                                                     |                                                                                                                                                     |                                                                                                                                             |                                                                                                                                             |
| EU integration:<br>EU Renaissance                                                                                                           | EU integration:<br>nobody cares                                                                                       | EU integration:<br>EU Renaissance                                                                                                                   | EU integration:<br>EU Renaissance                                                                                                                   | EU integration:<br>EU under threat                                                                                                          | EU integration:<br>EU under threat                                                                                                          |
|                                                                                                                                             | population in 2050:<br>strongly decreasing (67.4 m)                                                                   | population in 2050:<br>relatively high population (78.7 m)                                                                                          | population in 2050:<br>relatively high population (78.7 m)                                                                                          | population in 2050:<br>strongly decreasing (67.4 m)                                                                                         | population in 2050:<br>strongly decreasing (67.4 m)                                                                                         |
| GDP growth:<br>moderate (1.2 %/a)                                                                                                           | GDP growth:<br>moderate (1.2 %/a)                                                                                     | GDP growth:<br>strong (1.8 %/a)                                                                                                                     | GDP growth:<br>moderate (1.2 %/a)                                                                                                                   | GDP growth:<br>weak (0.6 %/a)                                                                                                               | GDP growth:<br>weak (0.6 %/a)                                                                                                               |
| employment market development:<br>employment market bifurcation                                                                             | employment market development:<br>employment market bifurcation                                                       | employment market development:<br>low unemployment / strong transition to flexible working hours<br>tertiarisation of the economy:<br>strong (80 %) | employment market development:<br>low unemployment / strong transition to flexible working hours<br>tertiarisation of the economy:<br>strong (80 %) | employment market development:<br>employment market bifurcation                                                                             | employment market development:<br>employment market bifurcation                                                                             |
|                                                                                                                                             | innovative ability of the economy:<br>stable                                                                          | innovative ability of the economy:<br>increasing                                                                                                    | innovative ability of the economy:<br>stable                                                                                                        | innovative ability of the economy:<br>decreasing                                                                                            | innovative ability of the economy:<br>decreasing                                                                                            |
| transnational flows of trade:<br>European Germany - focus on services                                                                       | transnational flows of trade:<br>global Germany                                                                       | transnational flows of trade:<br>European Germany - focus on services                                                                               | transnational flows of trade:<br>European Germany - focus on services                                                                               | transnational flows of trade:<br>European Germany - focus on services                                                                       | transnational flows of trade:<br>European Germany - focus on services                                                                       |
|                                                                                                                                             | International integration of electricity grids:<br>stronger European transmission network with European self-reliance | International integration of electricity grids:<br>trend towards national self-reliance (regarding capacities)                                      | International integration of electricity grids:<br>trend towards national self-reliance (regarding capacities)                                      | International integration of electricity grids:<br>trend towards national self-reliance (regarding capacities)                              | International integration of electricity grids:<br>trend towards national self-reliance (regarding capacities)                              |
| development of infrastructures in the power transmission and distribution grids:<br>delayed                                                 | development of infrastructures in the power transmission and distribution grids:<br>delayed                           | development of infrastructures in the power transmission and distribution grids:<br>undelayed                                                       | development of infrastructures in the power transmission and distribution grids:<br>undelayed                                                       | development of infrastructures in the power transmission and distribution grids:<br>strongly delayed                                        | development of infrastructures in the power transmission and distribution grids:<br>strongly delayed                                        |
| expansion of renewable energies in the electricity sector (electricity produced in 2050):<br>moderate (450 TWh/yr)                          | expansion of renewable energies in the electricity sector (electricity produced in 2050):<br>moderate (450 TWh/yr)    | expansion of renewable energies in the electricity sector (electricity produced in 2050):<br>strong (700 TWh/yr)                                    | expansion of renewable energies in the electricity sector (electricity produced in 2050):<br>strong (700 TWh/yr)                                    | expansion of renewable energies in the electricity sector (electricity produced in 2050):<br>weak (300 TWh/yr)                              | expansion of renewable energies in the electricity sector (electricity produced in 2050):<br>weak (300 TWh/yr)                              |
| trends central/decentralised electricity generation and storage:<br>trend towards integrating decentralised units into a centralised system | trends central/decentralised electricity generation and storage:<br>trend towards mixed structures                    | trends central/decentralised electricity generation and storage:<br>trend towards the transition to a decentralised system                          | trends central/decentralised electricity generation and storage:<br>trend towards the transition to a decentralised system                          | trends central/decentralised electricity generation and storage:<br>trend towards integrating decentralised units into a centralised system | trends central/decentralised electricity generation and storage:<br>trend towards integrating decentralised units into a centralised system |
|                                                                                                                                             | regulation electricity market:<br>modifications of existing markets (security of supply via market)                   | regulation electricity market:<br>modifications of existing markets (security of supply via market)                                                 | regulation electricity market:<br>modifications of existing markets (security of supply via market)                                                 | regulation electricity market:<br>modifications of existing markets (security of supply via market)                                         | regulation electricity market:<br>modifications of existing markets (security of supply via market)                                         |
| policy stability in the energy field:<br>constant                                                                                           | policy stability in the energy field:<br>constant                                                                     | policy stability in the energy field:<br>increasing                                                                                                 | policy stability in the energy field:<br>increasing                                                                                                 | policy stability in the energy field:<br>decreasing                                                                                         | policy stability in the energy field:<br>decreasing                                                                                         |
|                                                                                                                                             | governance in the energy field:<br>preference for non-technology-specific economic instruments                        | governance in the energy field:<br>preference for non-technology-specific economic instruments                                                      | governance in the energy field:<br>preference for non-technology-specific economic instruments                                                      | governance in the energy field:<br>preference for non-technology-specific economic instruments                                              | governance in the energy field:<br>preference for non-technology-specific economic instruments                                              |
| governance of infrastructure expansion:<br>trend towards non-coordinated expansion                                                          | governance of infrastructure expansion:<br>trend towards non-coordinated expansion                                    | governance of infrastructure expansion:<br>trend towards coordinated expansion                                                                      | governance of infrastructure expansion:<br>trend towards coordinated expansion                                                                      | governance of infrastructure expansion:<br>trend towards non-coordinated expansion                                                          | governance of infrastructure expansion:<br>trend towards non-coordinated expansion                                                          |
| planning legislation/public infrastructure planning:<br>compromise                                                                          | planning legislation/public infrastructure planning:<br>compromise                                                    | planning legislation/public infrastructure planning:<br>focus on legislation and acceptance                                                         | planning legislation/public infrastructure planning:<br>focus on legislation and acceptance                                                         | planning legislation/public infrastructure planning:<br>focus on legislation and acceptance                                                 | planning legislation/public infrastructure planning:<br>focus on legislation and acceptance                                                 |
| political guidelines:<br>more focus on market mechanism                                                                                     | political guidelines:<br>more focus on market mechanism                                                               | political guidelines:<br>more focus on public participation and transparency                                                                        | political guidelines:<br>more focus on public participation and transparency                                                                        | political guidelines:<br>more focus on public participation and transparency                                                                | political guidelines:<br>more focus on public participation and transparency                                                                |
| welfare state development:<br>more emphasis on liberal welfare elements                                                                     | welfare state development:<br>more emphasis on liberal welfare elements                                               | welfare state development:<br>more emphasis on liberal welfare elements                                                                             | welfare state development:<br>more emphasis on liberal welfare elements                                                                             | welfare state development:<br>more emphasis on liberal welfare elements                                                                     | welfare state development:<br>more emphasis on liberal welfare elements                                                                     |
| income distribution:<br>increasing inequality and increasing average income                                                                 | income distribution:<br>increasing inequality and increasing average income                                           | income distribution:<br>constant or decreasing inequality and increasing average income                                                             | income distribution:<br>constant or decreasing inequality and increasing average income                                                             | income distribution:<br>increasing inequality and increasing average income                                                                 | income distribution:<br>increasing inequality and increasing average income                                                                 |
| technology acceptance (energy technologies):<br>decreasing                                                                                  | technology acceptance (energy technologies):<br>decreasing                                                            | technology acceptance (energy technologies):<br>slightly increasing                                                                                 | technology acceptance (energy technologies):<br>slightly increasing                                                                                 | technology acceptance (energy technologies):<br>decreasing                                                                                  | technology acceptance (energy technologies):<br>decreasing                                                                                  |
| individual energy consuming behaviour:<br>trend towards non-involvement                                                                     | individual energy consuming behaviour:<br>trend towards non-involvement                                               | individual energy consuming behaviour:<br>trend towards technology                                                                                  | individual energy consuming behaviour:<br>trend towards technology                                                                                  | individual energy consuming behaviour:<br>trend towards technology                                                                          | individual energy consuming behaviour:<br>trend towards technology                                                                          |
| educational development:<br>strong focus on MINT/strong limitation on access                                                                | educational development:<br>strong focus on MINT/strong limitation on access                                          | educational development:<br>strong focus on MINT/strong limitation on access                                                                        | educational development:<br>strong focus on MINT/strong limitation on access                                                                        | educational development:<br>strong focus on MINT/strong limitation on access                                                                | educational development:<br>strong focus on MINT/strong limitation on access                                                                |
| public attitude towards the energy transition / NIMBY:<br>no trend visible                                                                  | public attitude towards the energy transition / NIMBY:<br>no trend visible                                            | public attitude towards the energy transition / NIMBY:<br>trend towards positive attitude                                                           | public attitude towards the energy transition / NIMBY:<br>trend towards positive attitude                                                           | public attitude towards the energy transition / NIMBY:<br>trend towards positive attitude                                                   | public attitude towards the energy transition / NIMBY:<br>trend towards positive attitude                                                   |
| trend towards negative attitude                                                                                                             | trend towards negative attitude                                                                                       | value orientation and objectives in economic development:<br>trend towards post-materialism                                                         | value orientation and objectives in economic development:<br>trend towards post-materialism                                                         | value orientation and objectives in economic development:<br>trend towards post-materialism                                                 | value orientation and objectives in economic development:<br>trend towards post-materialism                                                 |
| media discourse:<br>slight plurality of opinion/ strong trend for tabloidization                                                            | media discourse:<br>slight plurality of opinion/ strong trend for tabloidization                                      | media discourse:<br>high plurality of opinion/ strong trend for tabloidization                                                                      | media discourse:<br>high plurality of opinion/ strong trend for tabloidization                                                                      | media discourse:<br>slight plurality of opinion/ strong trend for tabloidization                                                            | media discourse:<br>slight plurality of opinion/ strong trend for tabloidization                                                            |
|                                                                                                                                             | reduction energy demand - household appliances:<br>weak (0.6 % per year)                                              | reduction energy demand - household appliances:<br>weak (0.6 % per year)                                                                            | reduction energy demand - household appliances:<br>weak (0.6 % per year)                                                                            | reduction energy demand - household appliances:<br>weak (0.6 % per year)                                                                    | reduction energy demand - household appliances:<br>weak (0.6 % per year)                                                                    |
| reduction energy demand - PC electric:<br>weak (0.8 % per year)                                                                             | reduction energy demand - PC electric:<br>weak (0.8 % per year)                                                       | reduction energy demand - PC electric:<br>moderate (1.7 % per year)                                                                                 | reduction energy demand - PC electric:<br>moderate (1.7 % per year)                                                                                 | reduction energy demand - PC electric:<br>strong (2.1 % per year)                                                                           | reduction energy demand - PC electric:<br>strong (2.1 % per year)                                                                           |
| reduction energy demand - PC:<br>strong (1.55 % per year)                                                                                   | reduction energy demand - PC:<br>strong (1.55 % per year)                                                             | reduction energy demand - PC engines (% per year):<br>strong (1.55 % per year)                                                                      | reduction energy demand - PC engines (% per year):<br>strong (1.55 % per year)                                                                      | reduction energy demand - PC engines (% per year):<br>weak (0.8 % per year)                                                                 | reduction energy demand - PC engines (% per year):<br>weak (0.8 % per year)                                                                 |
|                                                                                                                                             | renovation rate / depth - buildings (private):<br>strong (2 %/yr - 70 %)                                              | renovation rate / depth - buildings (private):<br>strong (2 %/yr - 70 %)                                                                            | renovation rate / depth - buildings (private):<br>strong (2 %/yr - 70 %)                                                                            | renovation rate / depth - buildings (private):<br>strong (2 %/yr - 70 %)                                                                    | renovation rate / depth - buildings (private):<br>strong (2 %/yr - 70 %)                                                                    |
|                                                                                                                                             | reduction energy demand - industry:<br>strong (2.3 % per year)                                                        | reduction energy demand - industry:<br>strong (2.3 % per year)                                                                                      | reduction energy demand - industry:<br>strong (2.3 % per year)                                                                                      | reduction energy demand - industry:<br>strong (2.3 % per year)                                                                              | reduction energy demand - industry:<br>strong (2.3 % per year)                                                                              |
|                                                                                                                                             | reduction energy demand - commercial sector:<br>strong (3.4 % per year)                                               | reduction energy demand - commercial sector:<br>strong (3.4 % per year)                                                                             | reduction energy demand - commercial sector:<br>strong (3.4 % per year)                                                                             | reduction energy demand - commercial sector:<br>strong (3.4 % per year)                                                                     | reduction energy demand - commercial sector:<br>strong (3.4 % per year)                                                                     |
|                                                                                                                                             | expansion district heating:<br>strong expansion                                                                       | expansion district heating:<br>strong expansion                                                                                                     | expansion district heating:<br>strong expansion                                                                                                     | expansion district heating:<br>strong expansion                                                                                             | expansion district heating:<br>strong expansion                                                                                             |
| investments new vehicle concepts and small (20% of vehicle market)                                                                          | investments new vehicle concepts and small (20% of vehicle market)                                                    | investments new vehicle concepts and moderate (50% of vehicle market)                                                                               | investments new vehicle concepts and moderate (50% of vehicle market)                                                                               | investments new vehicle concepts and moderate (50% of vehicle market)                                                                       | investments new vehicle concepts and moderate (50% of vehicle market)                                                                       |
| living trends:<br>strong increase (60 qm space per head)                                                                                    | living trends:<br>strong increase (60 qm space per head)                                                              | living trends:<br>strong increase (60 qm space per head)                                                                                            | living trends:<br>strong increase (60 qm space per head)                                                                                            | living trends:<br>strong increase (60 qm space per head)                                                                                    | living trends:<br>strong increase (60 qm space per head)                                                                                    |
| expansion of renewable energies for heating:<br>strong (400 TWh per year)                                                                   | expansion of renewable energies for heating:<br>strong (400 TWh per year)                                             | expansion of renewable energies for heating:<br>strong (400 TWh per year)                                                                           | expansion of renewable energies for heating:<br>strong (400 TWh per year)                                                                           | expansion of renewable energies for heating:<br>strong (400 TWh per year)                                                                   | expansion of renewable energies for heating:<br>strong (400 TWh per year)                                                                   |
|                                                                                                                                             | rebound effects individual energy demand:<br>moderate                                                                 | rebound effects individual energy demand:<br>moderate                                                                                               | rebound effects individual energy demand:<br>moderate                                                                                               | rebound effects individual energy demand:<br>moderate                                                                                       | rebound effects individual energy demand:<br>moderate                                                                                       |

### Details on assessment methods for model-based indicators and overview over indicator targets

The development of the energy demand is to a wide extent constrained by the context scenario (assessment method “CS” in Table S2) and requires only little extra assumptions and modelling. This is in particular true for the final energy productivity of the German economy, the German industry, and small enterprises. In other cases, indicators are pre-constrained by the context scenario. However, a number of other indicators are also rather directly determined by the context, but require extra energy system modelling (“ESM” in Table S2) and/or extra

modelers' assumptions ("MAS") to a larger extent. This includes, e.g., the final energy consumption for space heat of private households, where a simple building stock model is used to translate the context factors "renovation rate of buildings", "renovation depth" of buildings, population development, and development of the average floor space into the energy demand for heating. In the case of the indicator "final energy consumption of the transport sector", the assessment requires modelers' assumptions on, e.g., the split between BEVs/PHEVs on one hand and FCEVs on the other hand. Quantitative values for a last group of indicators cannot easily be traced back to a small number of context descriptors. They are thus regarded as a result of the complex interactions of the energy system model (thus assessment method "ESM" in Table S2).

The different assessment methods in Table S2 cannot always be clearly distinguished—their boundaries are fluid. However, it illustrates well that some sustainability indicators are more directly constrained by the context scenario than other indicators, which require more modelling and/or other input from the modelers' side.

**Table S2.** Details of assessment methods and target values for the 16 model-based indicators.

| Indicator                                                          | Assessment Method | Target Value 2050         |
|--------------------------------------------------------------------|-------------------|---------------------------|
| Energy-related emissions of particulate matter (TSP)               | EF                | 45.6 kt                   |
| Energy-related emissions of Cadmium                                | EF                | 2.0 t                     |
| Energy-related greenhouse gas emissions                            | EF                | 207 Mt CO <sub>2</sub> eq |
| Energy-related emissions of acid forming gases                     | EF                | 690 kt SO <sub>2</sub> eq |
| Final energy productivity of the German economy (GDP per FEC)      | CS                | 743 €/GJ                  |
| Final energy productivity of the German industry (GVA per FEC)     | CS                | 621 €/GJ                  |
| Final energy productivity of small enterprises (GHD) (GVA per FEC) | CS                | 3251 €/GJ                 |
| Final energy consumption in the transport sector                   | CS+MAS            | 1521 PJ                   |
| Final energy consumption of private households per capita          | CS+ESS            | 17.6 GJ/cap               |
| Installed capacity of renewable energy power plants                | CS+MAS+ESM        | 169 GW                    |
| Number of electric vehicles                                        | CS+MAS+ESM        | 22 Mio                    |
| Share of imported energy to primary energy consumption             | ESM               | 43%                       |
| Share of renewable energy on gross final energy consumption        | ESM               | 60%                       |
| Area under cultivation of energy crops                             | ESM               | 1.6 Mio h                 |
| Use of primary energy                                              | ESM               | 7190 PJ                   |
| Modal split in the transport sector                                | MAS               | 20%                       |

**Results (frequency distribution) of non-model-based indicators for all consistent scenarios as a data basis for the definition of targets for those indicators**

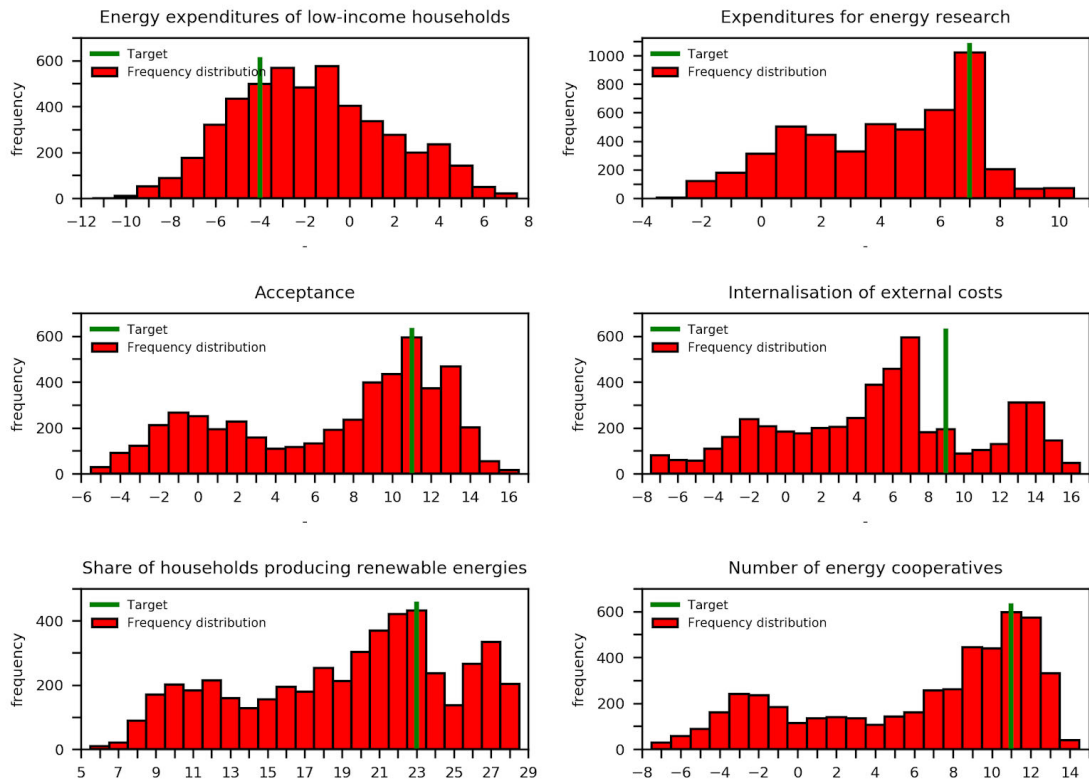

**Figure S1.** Frequency distribution of the values of all six non-model-based indicators among all consistent scenarios.

Figure S1 shows the frequency distribution of the results for the non-model-based indicators for all consistent scenarios. The green line indicates the target value defined as the 25% or 75% percentile, respectively (see Section 2.5 and Table S3). As explained in the main text, for each non-model-based indicator, a target value was chosen corresponding to the 25% percentile for those indicators where a decrease in the absolute indicator value is desired, and to the 75% percentile for those indicators where an increase in the indicator value is desired. Table S3 gives an overview over non-model-based indicators and the resulting target values.

**Table S3.** Definition of target-values for non-model-based indicators.

| Indicator                                                                   | Target Percentile | Target Value |
|-----------------------------------------------------------------------------|-------------------|--------------|
| Monthly energy expenditures of households with a monthly net income < 1300€ | 25%               | -4           |
| Federal expenditures for energy research                                    | 75%               | 7            |
| Acceptance of renewable energies in the neighbourhood                       | 75%               | 11           |
| Degree of internalization of energy-related external costs                  | 75%               | 9            |
| Share of households producing renewable electricity                         | 75%               | 23           |
| Number of energy cooperatives engaged in renewable energy plants            | 75%               | 11           |

### Additional results for model-based indicators

**Table S4.** Overview of model-based indicator results: Absolute values (top) and normalized values (bottom). A green color in the bottom table indicates normalized indicator values > 1 (scenario exceeds target), orange cells indicate that the indicator development 2015-2050 is going in the desired direction, but the target is not reached. The red cells indicate where the development between 2015 and 2050 is going in the opposite direction (relative to the target).

| Model-based indicators                                                                             | unit       | Target | Inertia | Market | Value Change | NH3   | NH8   |
|----------------------------------------------------------------------------------------------------|------------|--------|---------|--------|--------------|-------|-------|
| <b>model results (absolute values)</b>                                                             |            |        |         |        |              |       |       |
| Energy-related emissions of particulate matter (TSP)                                               | kt         | 29,6   | 45,7    | 39,6   | 34,8         | 35,0  | 29,0  |
| Energy-related emissions of cadmium                                                                | t          | 0,77   | 1,88    | 1,14   | 1,03         | 0,99  | 1,14  |
| Share of imported energy to primary energy use                                                     | %          | 48%    | 79%     | 59%    | 43%          | 39%   | 55%   |
| Final energy consumption of private households per capita                                          | GJ/cap/a   | 17,6   | 16,0    | 17,4   | 16,1         | 26,9  | 17,6  |
| Share of renewable energy on gross final energy consumption                                        | %          | 65%    | 33%     | 51%    | 74%          | 80%   | 56%   |
| Area under cultivation of energy crops                                                             | Mio. ha    | 3,7    | 3,1     | 2,2    | 2,1          | 2,1   | 1,9   |
| Use of primary energy                                                                              | PJ/a       | 7.274  | 11.057  | 8.498  | 9.078        | 8.502 | 7.876 |
| Specific Final Energy Consumption for Space Heat of Households (Temperature Adjusted)              | MJ/m2      | 145    | 146     | 146    | 144          | 362   | 146   |
| Final energy consumption in the transport sector                                                   | PJ/a       | 1.411  | 2.039   | 1.962  | 1.565        | 1.268 | 1.901 |
| Modal split in the transport sector (share of mileage by public transport - trains, trams, busses) | %          | 23%    | 21%     | 21%    | 26%          | 24%   | 21%   |
| Number of electric vehicles                                                                        | Mio        | 53,1   | 11,7    | 30,9   | 47,2         | 52,1  | 11,7  |
| Final energy productivity of the German economy (GDP per FEC)                                      | €/GJ       | 851    | 630     | 853    | 891          | 770   | 776   |
| Final energy productivity of the German industry (GVA per FEC)                                     | €/GJ       | 598    | 344     | 589    | 582          | 591   | 603   |
| Final energy productivity of small enterprises (GHD) (GVA per FEC)                                 | €/GJ       | 4.705  | 5.435   | 4.554  | 4.465        | 4.599 | 4.742 |
| Energy-related greenhouse gas emissions                                                            | Mt CO2eq/a | 160    | 582     | 243    | 166          | 141   | 227   |
| Energy-related emissions of acid forming gases                                                     | kt SO2eq   | 414    | 952     | 726    | 449          | 395   | 683   |
| Installed capacity of renewable energy power plants (w/o import, w/o biogenic waste)               | GW         | 187    | 118     | 170    | 346          | 318   | 175   |
| <b>normalised values</b>                                                                           |            |        |         |        |              |       |       |
| Energy-related emissions of particulate matter (TSP)                                               | %          | 201%   | 103%    | 140%   | 169%         | 168%  | 205%  |
| Energy-related emissions of cadmium                                                                | %          | 161%   | 90%     | 138%   | 145%         | 147%  | 137%  |
| Share of imported energy to primary energy use                                                     | %          | 83%    | -28%    | 44%    | 102%         | 118%  | 58%   |
| Final energy consumption of private households per capita                                          | %          | 107%   | 122%    | 109%   | 121%         | 21%   | 107%  |
| Share of renewable energy on gross final energy consumption                                        | %          | 91%    | 31%     | 65%    | 110%         | 121%  | 75%   |
| Area under cultivation of energy crops                                                             | %          | -254%  | -142%   | 6%     | 11%          | 19%   | 56%   |
| Use of primary energy                                                                              | %          | 95%    | 32%     | 75%    | 65%          | 75%   | 85%   |
| Specific Final Energy Consumption for Space Heat of Households (Temperature Adjusted)              | %          | 130%   | 129%    | 129%   | 130%         | 42%   | 129%  |
| Final energy consumption in the transport sector                                                   | %          | 109%   | 51%     | 58%    | 95%          | 122%  | 64%   |
| Number of electric vehicles                                                                        | %          | 352%   | 77%     | 205%   | 313%         | 346%  | 77%   |
| Final energy productivity of the German economy (GDP per FEC)                                      | %          | 124%   | 73%     | 124%   | 133%         | 105%  | 106%  |
| Final energy productivity of the German industry (GVA per FEC)                                     | %          | 84%    | 18%     | 82%    | 80%          | 83%   | 86%   |
| Final energy productivity of small enterprises (GHD) (GVA per FEC)                                 | %          | 156%   | 190%    | 149%   | 145%         | 151%  | 158%  |
| Energy-related greenhouse gas emissions                                                            | %          | 107%   | 26%     | 91%    | 106%         | 110%  | 94%   |
| Energy-related emissions of acid forming gases                                                     | %          | 217%   | 60%     | 126%   | 207%         | 223%  | 139%  |
| Installed capacity of renewable energy power plants (w/o import, w/o biogenic waste)               | %          | 125%   | 29%     | 102%   | 351%         | 311%  | 109%  |

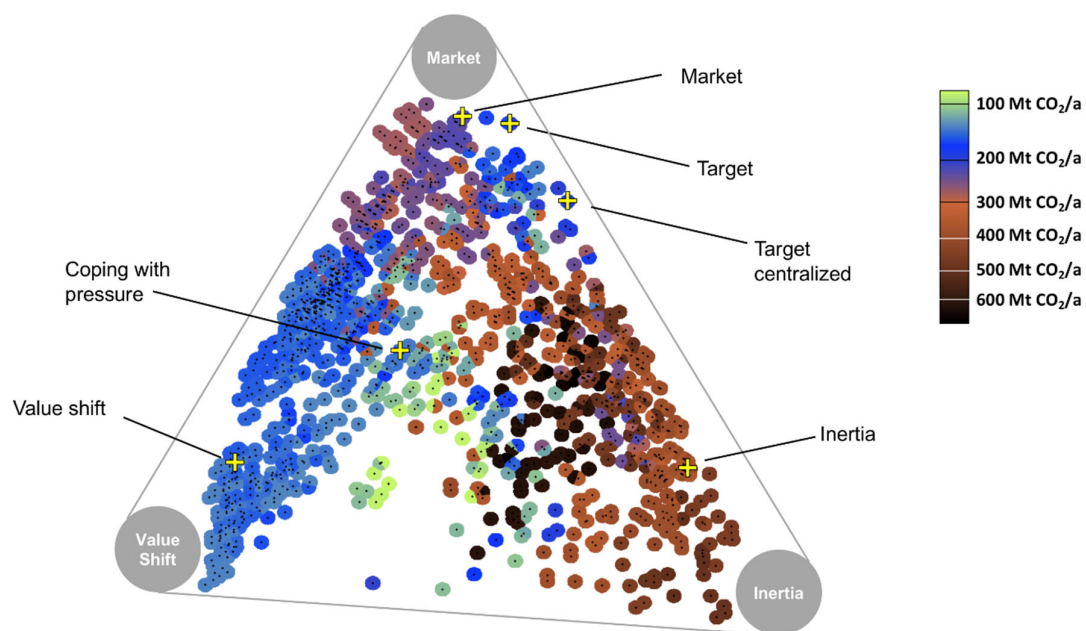

**Figure S2.** Localizations of the selected scenarios on Pregger et al.'s "landscape of societies".

### Impact assessments for indicator "Acceptance of Renewable Energies in the Neighborhood"

This table shows the impacts of all descriptor variants (2 to 4 per descriptor) on the indicator "Acceptance of Renewable Energies in the Neighborhood". The impacts were rated by the expert panel using an integer scale -3 (strongly restricting) to +3 (strongly promoting).

**Table S5.** Descriptor impacts on the indicator "Acceptance of Renewable Energies in the neighborhood" for different variants of the descriptors used in the scenarios.

| Acceptance of Renewable Energies in the Neighborhood |                                               |                                                  |                                      |                   |
|------------------------------------------------------|-----------------------------------------------|--------------------------------------------------|--------------------------------------|-------------------|
| Global development                                   |                                               |                                                  |                                      |                   |
| General                                              | Market Forces                                 | Policy Reform                                    | Fortress World                       | Eco-Communalism   |
|                                                      | 0                                             | 1                                                | 2                                    | 2                 |
| Global development                                   |                                               |                                                  |                                      |                   |
| Price for fossil fuels                               | Low prices                                    | Moderate growth of prices                        | Strong growth of prices              |                   |
|                                                      | 0                                             | 1                                                | 2                                    |                   |
| EU integration                                       |                                               |                                                  |                                      |                   |
|                                                      | EU Renaissance                                | Nobody Cares                                     | EU under threat                      |                   |
|                                                      | 0                                             | 0                                                | 0                                    |                   |
| Population development                               |                                               |                                                  |                                      |                   |
|                                                      | Strongly decreasing                           | Moderately decreasing                            | Relatively high population           |                   |
|                                                      | 0                                             | 0                                                | 0                                    |                   |
| GDP growth                                           |                                               |                                                  |                                      |                   |
|                                                      | Weak development                              | Moderate development                             | Strong development                   |                   |
|                                                      | 0                                             | 0                                                | 0                                    |                   |
| Labour market development                            |                                               |                                                  |                                      |                   |
|                                                      | Low unemployment / pro-<br>worker flexibility | High unemployment / pro-<br>employer flexibility | Division of labour market            |                   |
|                                                      | 0                                             | 0                                                | 0                                    |                   |
| Tertiarisation of the economy                        |                                               |                                                  |                                      |                   |
|                                                      | Weak tertiarisation                           | Strong tertiarisation                            |                                      |                   |
|                                                      | 0                                             | 0                                                |                                      |                   |
| Innovation capabilities                              |                                               |                                                  |                                      |                   |
|                                                      | Decreasing                                    | Constant                                         | Increasing                           |                   |
|                                                      | 0                                             | 0                                                | 1                                    |                   |
| Transnational trade flows                            |                                               |                                                  |                                      |                   |
|                                                      | European Germany                              | European Germany - focus<br>on services          | Global Germany                       | Renationalization |
|                                                      | 0                                             | 0                                                | 0                                    | 0                 |
| International power line<br>integration              |                                               |                                                  |                                      |                   |
|                                                      | Trend national capacity<br>autarky            | Trend European power grid<br>/ European autarky  | Trend trans-European<br>optimization |                   |
|                                                      | 1                                             | 0                                                | 0                                    |                   |

|                                                         |                                                        |                                                   |                                                      |                                                    |
|---------------------------------------------------------|--------------------------------------------------------|---------------------------------------------------|------------------------------------------------------|----------------------------------------------------|
| Infrastructure expansion of power lines                 | Appropriate expansion<br>0                             | Delayed expansion<br>0                            | Strongly delayed expansion<br>0                      |                                                    |
| Renewable electricity expansion                         | Weak expansion<br>0                                    | Moderate expansion<br>0                           | Strong expansion<br>1                                |                                                    |
| Centralized/decentralized power generation and -storage | Integration of dec. units into the central system<br>0 | Hybrid structure<br>0                             | Conversion to decentralized system architecture<br>1 |                                                    |
| Electricity market regulations                          | Market in charge of security of supply<br>0            | Providers in charge of security of supply<br>0    | State in charge of security of supply<br>0           |                                                    |
| Energy policy stability                                 | Decreasing policy stability<br>-1                      | Constant policy stability<br>0                    | Increasing policy stability<br>1                     |                                                    |
| Energy policy instruments                               | Regulatory instruments<br>0                            | Technology-specific economic instruments<br>0     | Technology-unspecific economic instruments<br>0      |                                                    |
| Governance in the field of infrastructure expansion     | Coordinated expansion<br>0                             | Uncoordinated expansion<br>0                      | x                                                    |                                                    |
| Planning law / public infrastructure planning           | Focus acceleration<br>0                                | Focus legitimacy and acceptance<br>0              | Dominance of group interests<br>0                    | Compromise<br>0                                    |
| Political design model                                  | State control<br>-1                                    | Citizen's participation and transparency<br>1     | Market mechanisms<br>-1                              | No significant shift<br>0                          |
| Social welfare state design                             | Liberal welfare state<br>0                             | Conservative-corporatist welfare state<br>0       | Social democratic welfare state<br>0                 |                                                    |
| Private income development                              | Increasing inequality / low income growth<br>0         | Const.- decr. inequality / low income growth<br>0 | Increasing inequality / high income growth<br>0      | Const.- decr. inequality / high income growth<br>0 |
| Acceptance of energy technologies                       | Decreasing<br>-2                                       | Constant<br>0                                     | Slightly increasing<br>1                             | Strongly increasing<br>3                           |
| Energy consumption behaviour (individual)               | Trend towards being unconcerned<br>0                   | Trend towards being economical<br>0               | Trend towards being technology-focused<br>0          | Trend towards sustainability<br>0                  |
| Education development                                   | Focus MINT / low access barriers<br>1                  | Focus MINT / strong access barriers<br>0          | Focus general education / low access barriers<br>-1  |                                                    |
